# Supplementary material for: Genotoxicity and molecular response of silver nanoparticle (NP)-based hydrogel
Source: PubMed Central journal article supplement (PMC3430588; doi:10.1186/1477-3155-10-16), 2012-05-01

**Additional figure 1.** The size and size distribution of the silver nanoparticles determined by transmission electron microscopy (TEM). A: X 10000, bar = 200 nm; B: X 20000, bar = 100 nm.

**A**

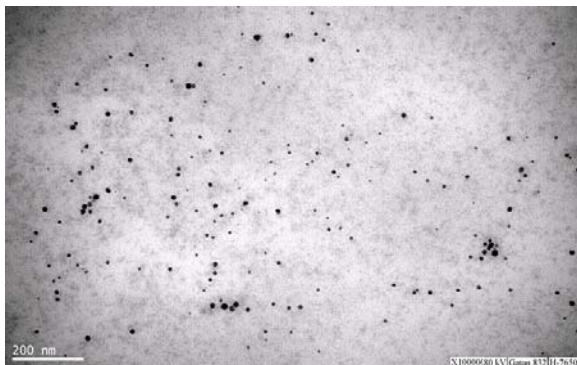

**B**

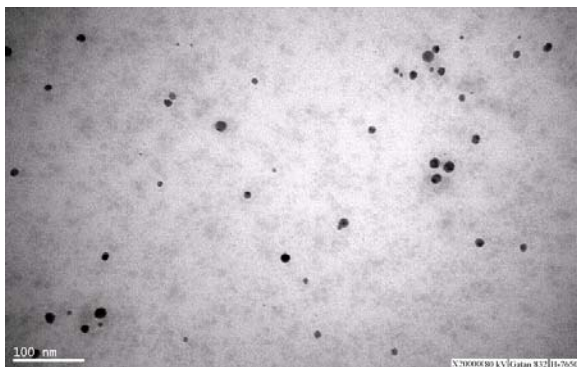

Supplement: 1477-3155-10-16-S16.pdf [file 1477-3155-10-16-S16.pdf]
